# Supplementary material for: Association between calf circumference and cardiac metabolic risk factors in middle-aged and elderly women
Source: PubMed Central journal article supplement — Heliyon. 2023 Jun 20;9(6):e17456. doi: 10.1016/j.heliyon.2023.e17456 (PMC10319178; doi:10.1016/j.heliyon.2023.e17456), 2023-06-20
Supplement: mmc1.pdf [file mmc1.pdf]

温州市中心医院医学伦理委员会伦理审查批件

批件号: 2019-03-009

|                                                                                   |                                                                                   |          |               |
|-----------------------------------------------------------------------------------|-----------------------------------------------------------------------------------|----------|---------------|
| 审查日期                                                                              | 2019年7月26日                                                                        |          |               |
| 审查会议地点                                                                            | -----                                                                             |          |               |
| 临床研究项目                                                                            | 成年女性颈围、小腿围与心血管风险的相关性研究                                                            |          |               |
| 审查文件                                                                              | 伦理审查申请表<br>临床研究方案(版本号: 1.0, 版本日期: 2019年4月18号)<br>知情同意书(版本号: 1.0, 版本日期: 2019年7月1号) |          |               |
| 审查类别                                                                              | 温州市科学技术局基础公益项目                                                                    |          |               |
| 临床研究单位                                                                            | 温州市中心医院                                                                           |          |               |
| 研究负责人                                                                             | 蓝爱春                                                                               |          |               |
| 伦理审查方式                                                                            | 会议审查 <input type="checkbox"/> 快速审查 <input checked="" type="checkbox"/>            |          |               |
| 根据国家卫生和计<br>生委2016年颁布实施的<br>《涉及人的生物医学研<br>究伦理审查办法》以及<br>《赫尔辛基宣言》原则,<br>经本伦理委员会审查。 | 同意开展。                                                                             |          |               |
| 批件有效期                                                                             | 2019年7月26日至2021年7月25日                                                             | 联系电<br>话 | 0577-88070780 |
| 伦理委员会盖章<br>日期: 2019.7.26                                                          |                                                                                   |          |               |

本审查自签发之日起有效期二年, 研究负责人必须严格使用经审查同意的研究方案和知情同意书。如伦理审查批件失效时不能完成所有的临床研究, 请在本批件失效前一个月, 递交持续审查申请。研究中发生涉及受试者或其他人风险的任何预期或非预期的不良事件, 应立刻报告本伦理委员会; 任何研究方案、知情同意书的修改包括研究人员得变更, 必须递交研究方案修改申请表, 经伦理审查委员会审查获得批准后执行。
