# Supplementary material for: Association between calf circumference and cardiac metabolic risk factors in middle-aged and elderly women
Source: PubMed Central journal article supplement — Heliyon. 2023 Jun 20;9(6):e17456. doi: 10.1016/j.heliyon.2023.e17456 (PMC10319178; doi:10.1016/j.heliyon.2023.e17456), 2023-06-20
Supplement: mmc2.pdf [file mmc2.pdf]

# 项目研究调查问卷

为了探讨小腿围与高血压、血糖异常、血脂异常为代表的心脏代谢风险因素的关联性研究，特做此心血管健康相关调查。请您认真如实回答。感谢您的参与和支持！

1、性别：（                      ）

☒ 男

☐ 女

2、年龄：（                      ）

☒ 40-50 岁

☐ 51-60 岁

☐ 61-70 岁

☐ 71-80 岁

3、教育程度：（                      ）

☐ 小学

☐ 初/高中

☐ 大学（含专科）

☐ 硕士及以上

4、从事职业：（                      ）

☐ 以体力劳动为主

☐ 以脑力劳动为主

☐ 退休人员

5、工作时间：（                      ）

☐ 平均每周不超过 40 小时

☐ 平均每周 41—50 小时

☐ 平均每周 51—60 小时

☐ 平均每周 60 小时以上

6、您进行锻炼或户外运动的频率：（ ）

☐ 每天坚持运动一小时左右

☐ 每周运动一次

☐ 每月运动一次

☐ 几乎不运动

7、若不经常运动，原因是

8、您平常烹饪或食用食物所用油量：（ ）

☐ 多

☐ 一般

☐ 很少

9、您平常烹饪或食用食物所用盐量：（ ）

☐ 多

☐ 一般

☐ 很少

10、你是否经常吃以下食物：（可多选）（ ）

☐ 肉类（瘦肉，禽类等）

☐ 脂肪类（动物内脏，肥肉等）

☐ 豆制品

☐ 鱼类

☐ 蛋类蔬菜

☐ 奶类

☐ 甜食

☐ 水果

11、您的吸烟习惯是：( ) (若选“从来不吸烟”请跳过 a、b 两题)

☐ 从来不吸烟

☐ 过去吸，现在已戒

☐ 一直在吸烟

a、若一直有吸烟的习惯，您累计吸烟的年限为多少：( )

☐ 1 年内

☐ 1—5 年

☐ 6—10 年

☐ 10 年以上

b、您每天的吸烟量约为多少支：( )

☐ 偶尔

☐ 5—10 支/日

☐ 1—20 支/日

☐ 20 支/日以上

12、在过去一年里，你喝酒的频率是：( )

☐ 每日

☐ 每周 2 次以上

☐ 每月小于 5 次

☐ 一年小于 5 次

☐ 从不

13、您觉得工作生活压力大吗：( )

☐ 非常大

☐ 很大

☐ 较大

☐ 不大

14、您认为平时血压控制在什么水平比较理想：（ ）

☐ 100/60mmHg

☐ 120/80mmHg

☐ 140/95mmH

☐ 不清楚

15、您平时会关注心血管疾病方面的健康知识吗：（ ）

☐ 经常主动了解

☐ 偶尔看看

☐ 从来不关心

16、您的家人是否患有心血管疾病（如冠心病，中风，心律失常，高血压，高血脂等）：（ ）

☐ 是

☐ 否

☐ 不知道

17、您是否被医生判断过患有以下疾病：（ ）（入选“无”直接跳过 a、b 两题）患有心血管疾病（如冠心病，中风，心律失常，高血压，高血脂等）：（ ）

☐ 冠心病

☐ 中风

☐ 心律失常

☐ 高血压

☐ 高血脂

☐ 糖尿病

☐ 风湿性心脏病

☐ 其他

☐ 无

18、a、如您患有或曾经有过上述疾病或症状，您当初的治疗方法是：（如选“服药”请回答 b 题）（ ）

☐ 服药

☐ 手术

☐ 有症状但忍着没有就医

☐ 因无自觉症状，认为无需就医

b、如果您服过相应的治疗药物，您的服药方式是：（ ）

☐ 按医生医嘱坚持用药，并定期就医、复诊

☐ 遵医嘱服药，症状消失就自行停药

☐ 从不去医院配药，自购药物，症状缓解后停药

☐ 间断服药

19、您每年是否会定期进行体检：（ ）

☐ 有

☐ 没有

☐ 生病了才会去检查

20、您是否会经常测量血压：（ ）

☐ 经常

☐ 偶尔

☐ 从来不测

21、如果有预防控制心血管病的活动，是否愿意参加：（ ）

☐ 是

☐ 不是

☐ 不一定

22. 姓名\*

23. 联系方式\*

[illegible]
